# Supplementary material
Source: Springer Nature journal article supplement (https://www.springermedizin.de/resource/supplementary/12906_2014_1932_MOESM1_ESM.pdf/9523238)

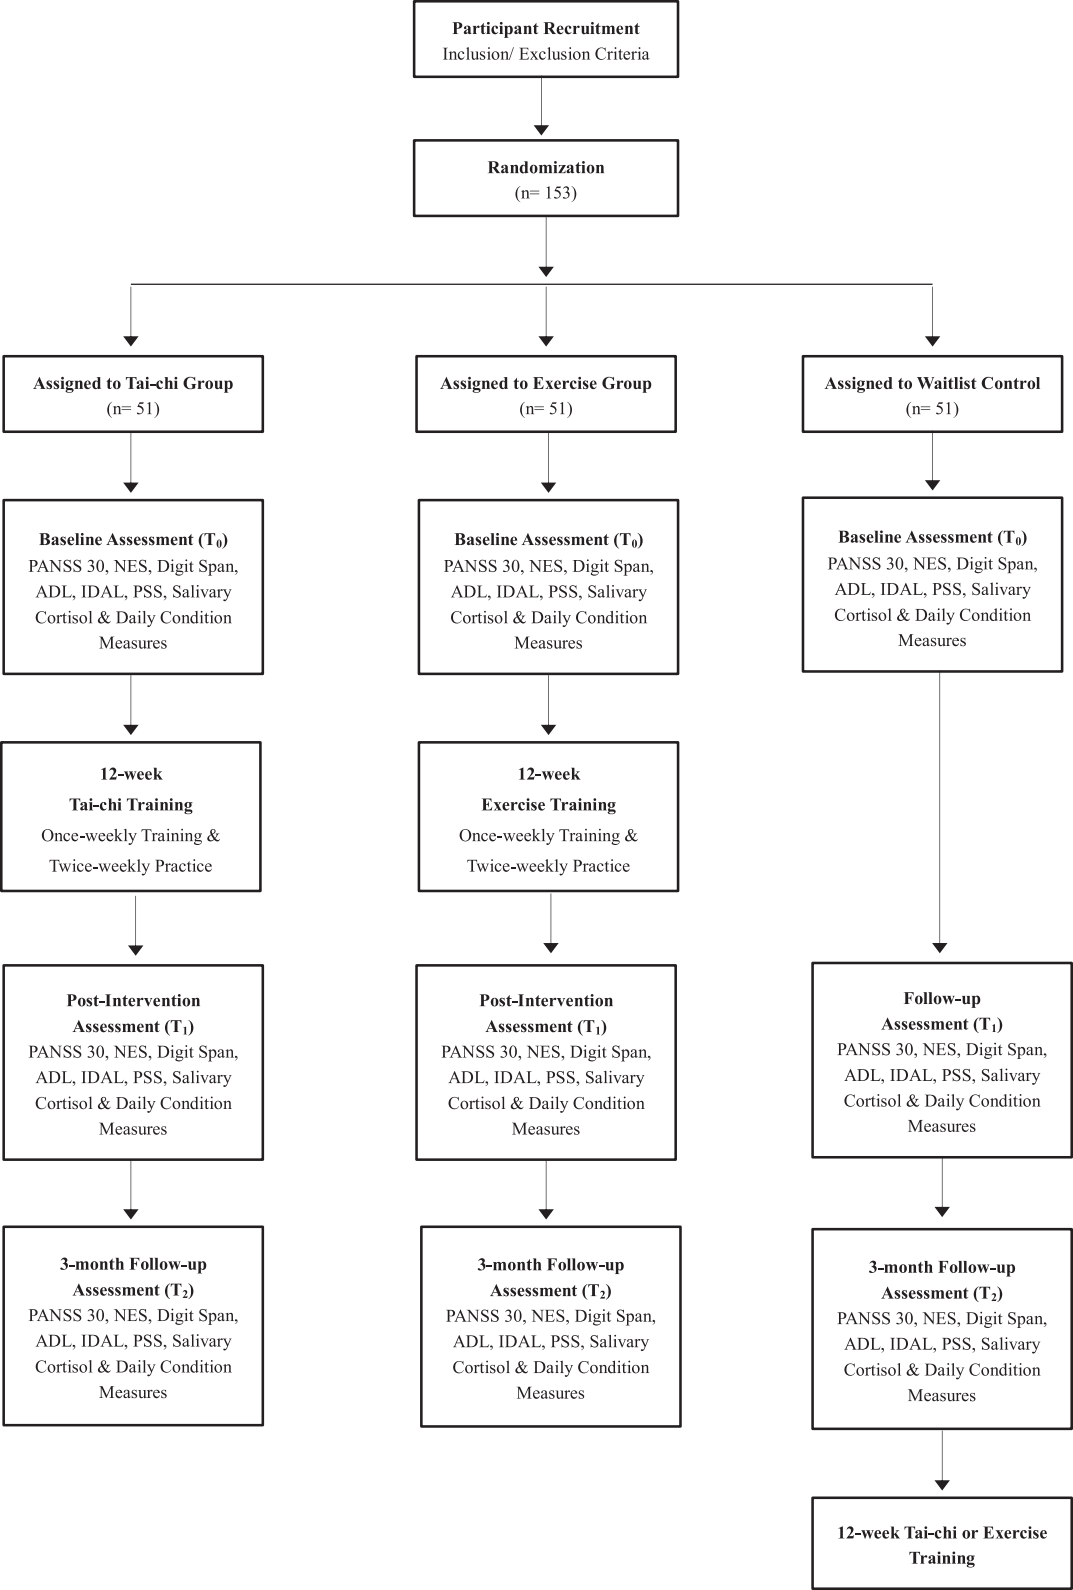

Supplement: MOESM1 [file 9523238]
